# Supplementary material
Source: PubMed Central journal article supplement (PMC7392324)
Supplement: NIHMS1575968-supplement-1.pdf [file NIHMS1575968-supplement-1.pdf]

Table S1: ICD9 and CPT/HCPCS codes

|                                                | <b>ICD9 procedure code</b>                                                                                                                                                                                                                    | <b>CPT/HCPCS code</b>                                                                                                                                                                                     |
|------------------------------------------------|-----------------------------------------------------------------------------------------------------------------------------------------------------------------------------------------------------------------------------------------------|-----------------------------------------------------------------------------------------------------------------------------------------------------------------------------------------------------------|
| Debulking surgery                              | 54.4, 65.2, 65.3, 65.31, 65.39, 65.4, 65.41, 65.49, 65.5, 65.51, 65.52, 65.53, 65.54, 65.6, 65.61, 65.62, 65.63, 65.64, 68.3, 68.31, 68.39, 68.4, 68.41, 68.49, 68.5, 68.51, 68.59, 68.6, 68.71, 68.79, 68.7, 68.71, 68.79, 68.8, 68.9, 70.32 | 56303, 56307, 56308, 57531, 58150, 58152, 58200, 58210, 58240, 58262, 58263, 58720, 58920, 58940, 58943, 58950, 58951, 58952, 58953, 58954, 58960                                                         |
| Intravenous administration of chemotherapy     | 99.25                                                                                                                                                                                                                                         | 96408, 96409, 96410, 96411, 96412, 96413, 96414, 96415, 96416, 96417, 96501, 96504, 96505, 96508, 96509, 96510, 96511, 96512, C8953, C8954, C8955, G0359, G0360, G0361, Q0083, Q0084, Q0085, S9330, S9331 |
| Intraperitoneal administration of chemotherapy | 54.97                                                                                                                                                                                                                                         | 96445, 96446                                                                                                                                                                                              |
| Chemotherapeutic agents                        |                                                                                                                                                                                                                                               | Carboplatin: J9045<br>Cisplatin: J9060, J9062<br>Oxaliplatin: J9263<br>Paclitaxel: J9254, J9265, J9267<br>Docetaxel: J9170, J9171<br>Bleomycin: J9040<br>Etoposide: J9181, J9182<br>Bevacizumab: J9035    |

ICD-9, International Classification of Diseases, 9th Revision;

CPT, Common Procedural Terminology; HCPCS, Healthcare Common Procedure Coding System
